# Supplementary material for: Soil Responses to Nano-enhanced Bioremediation Techniques: Comparative Analysis of Bio-based Vermicompost, Fe3O4 Nanoparticles, and Their Novel Synergistic Effects against Phthalate Contamination
Source: Research Square preprint supplement (doi:10.21203/rs.3.rs-6787119/v1), 2025-06-09
Supplement: Supplementary file 1 [file 1a831e85d8826afa6e418cc4.docx]

**Appendix A (Supplementary Materials)**

**Soil Responses to Nano-enhanced Bioremediation Techniques: Comparative Analysis of Bio-based Vermicompost, Fe3O4 Nanoparticles, and Their Novel Synergistic Effects against Phthalate Contamination**

Laleh Ghafghazi 1. Lobat Taghavi 1**[[1]](#footnote-1)***. Behnam Rasekh 2. Hadi Farahani 2. Mahyar Safa 3

**1***Department of Natural Resources and Environment, SR.C., Islamic Azad University, P. O. Box 14515-775, Tehran, Iran.*

*laleh.ghafghazi@gmail.com; laleh.ghafghazi@srbiau.ac.ir*

*taghavi_lobat@yahoo.com*; *l.taghavi@srbiau.ac.ir*

**2** *Environment & Biotechnology Division, Research Institute of Petroleum Industry (RIPI),* *P.O. Box: 14665-137 Tehran, Iran.*

*b.rasekh@gmail.com*

*hadifarahani@gmail.com*

**3***Department of Environmental Engineering (Solid Waste),* *Faculty of Environment, University of Tehran,* *Iran.*

*mahyarsafa77@yahoo.com*

**Contents**

| **Supplementary Figures** | **Pages** | **Supplementary Tables** | **Pages** |
| --- | --- | --- | --- |
| Fig. S1  Fig. S2  Fig. S3  Fig. S4 | 3  4  5  6 | Table S1  Table S2  Table S3  Table S4  Table S5  Table S6  Table S7  Table S8  Table S9  Table S10 | 7  8  8  9  10  11  12  13  14  15 |

| 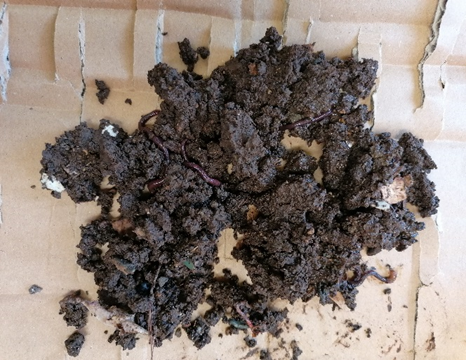  **Eisenia Fetida in compost media** | | **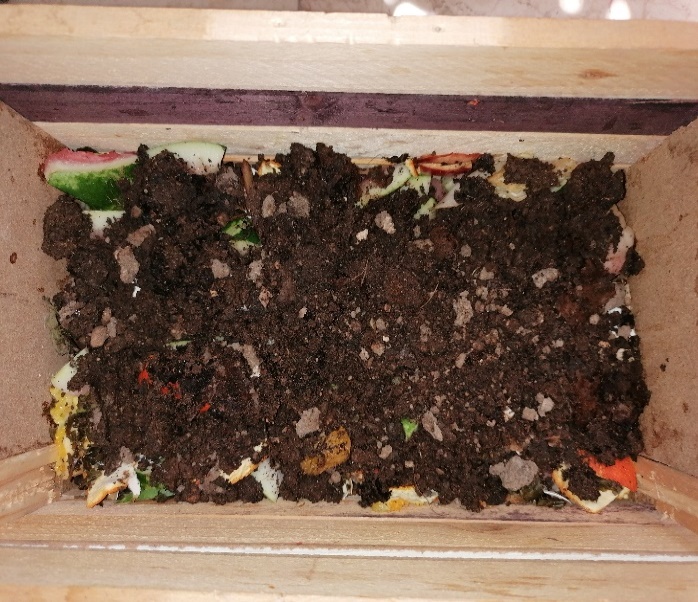** | **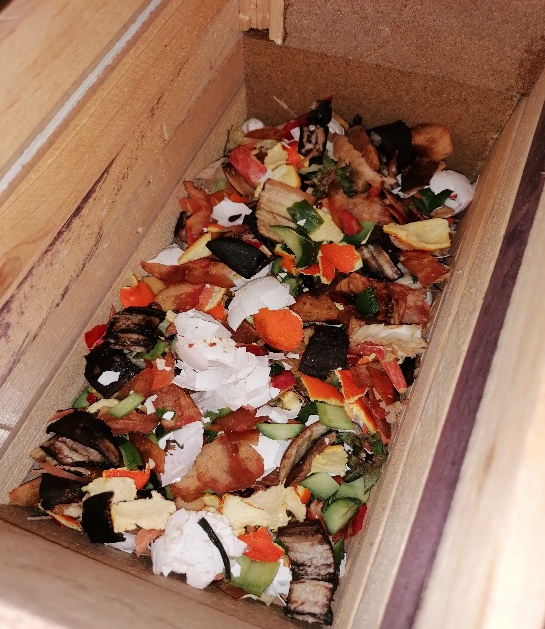** |
| --- | --- | --- | --- |
| **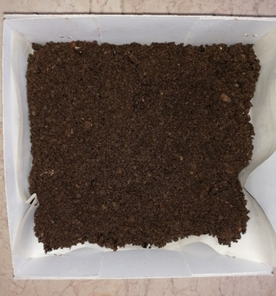**  **Final Vermicompost** | 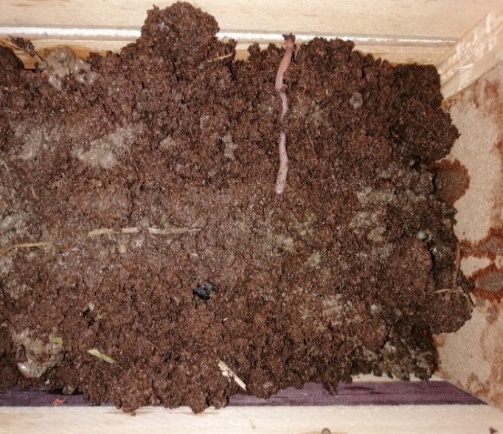 | | **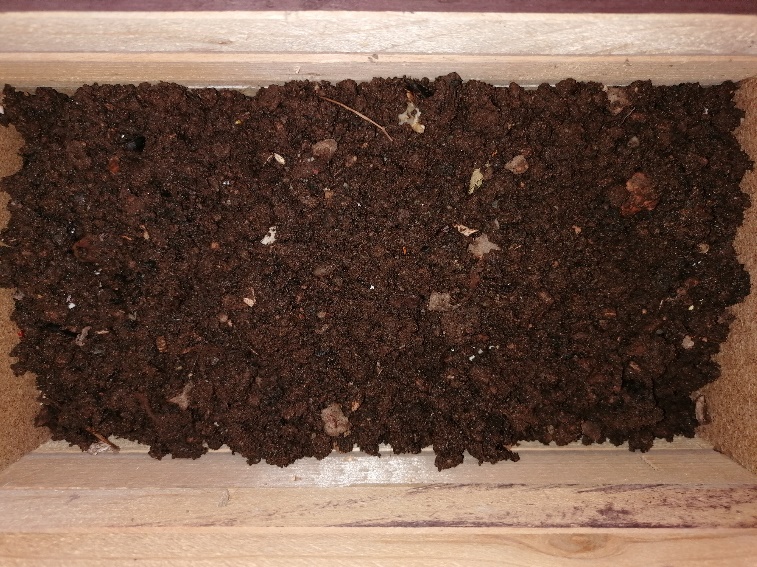** |

**Fig. S1** Vermicompost preparation in a decay-resistant wooden reactor with *Eisenia Fetida* post-treatment.

| 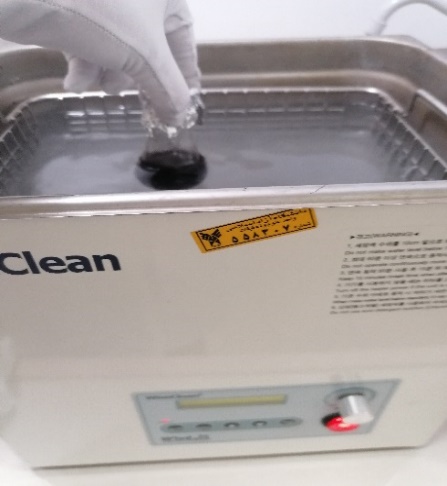 | **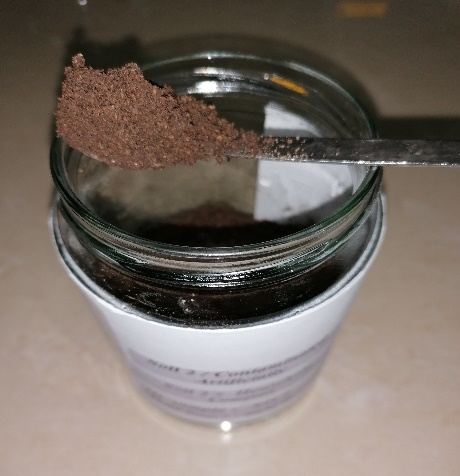** | **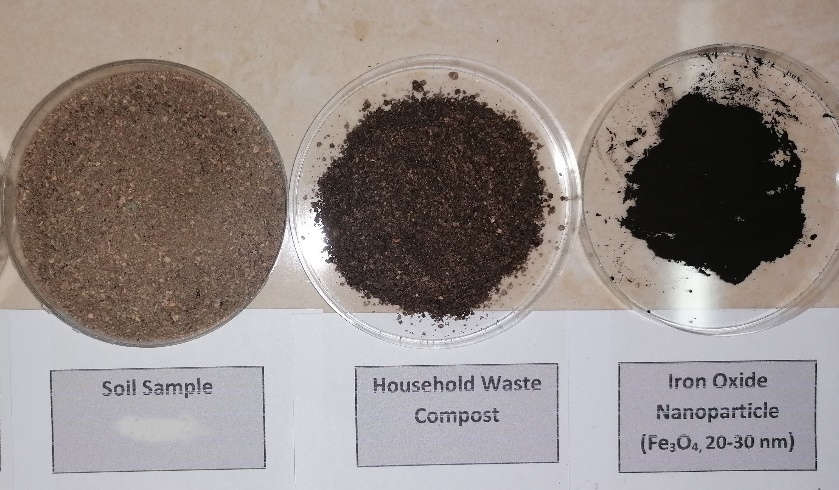** |
| --- | --- | --- |
| **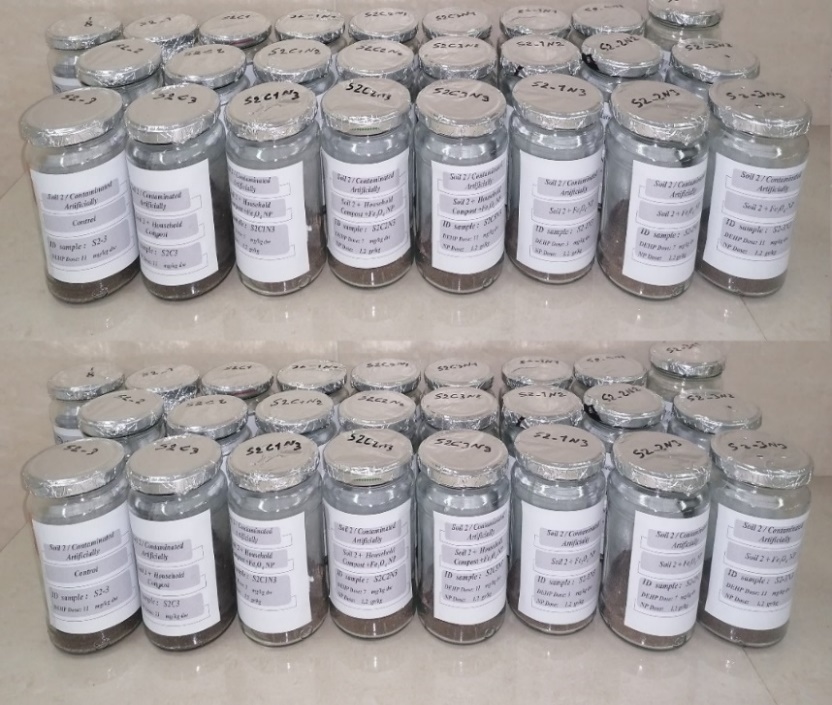** | | 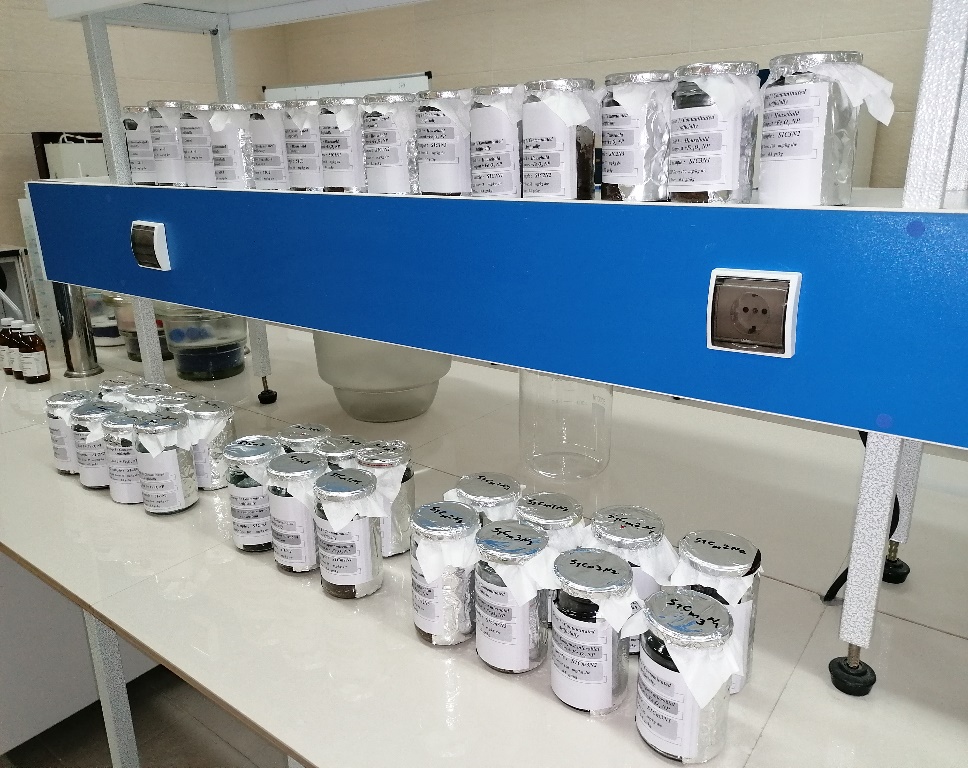 |

**Fig. S2** Prepared group's treatments in the incubation/exposure study.

| | **FT-IR** **Peaks**  **a** | | | | --- | --- | --- | | **Vibrations** | | **ν (cm-1)** | |  | **Fe2O3, Fe3O4** | **514, 518** | | **C-H bending (Alkyne)** | **620 ,649** | | **C-H bending (Aromatic)** | **781, 873** | | **RCOOH (O-H) bending** | **924** | | **RCOOH (C-O) bending** | **1015, 1044** | | **Alcohol (C-O)** | **1101** | | **CO32- or C-C Aromatic in ring** | **1418** | | **N=O (Nitroso)** | **1574** | | **C=N, N-H** | **1625** | | **C-H stretching** | **2935** | |  | **O-H (with hydrogen bonding (** | **3445** | | **b**  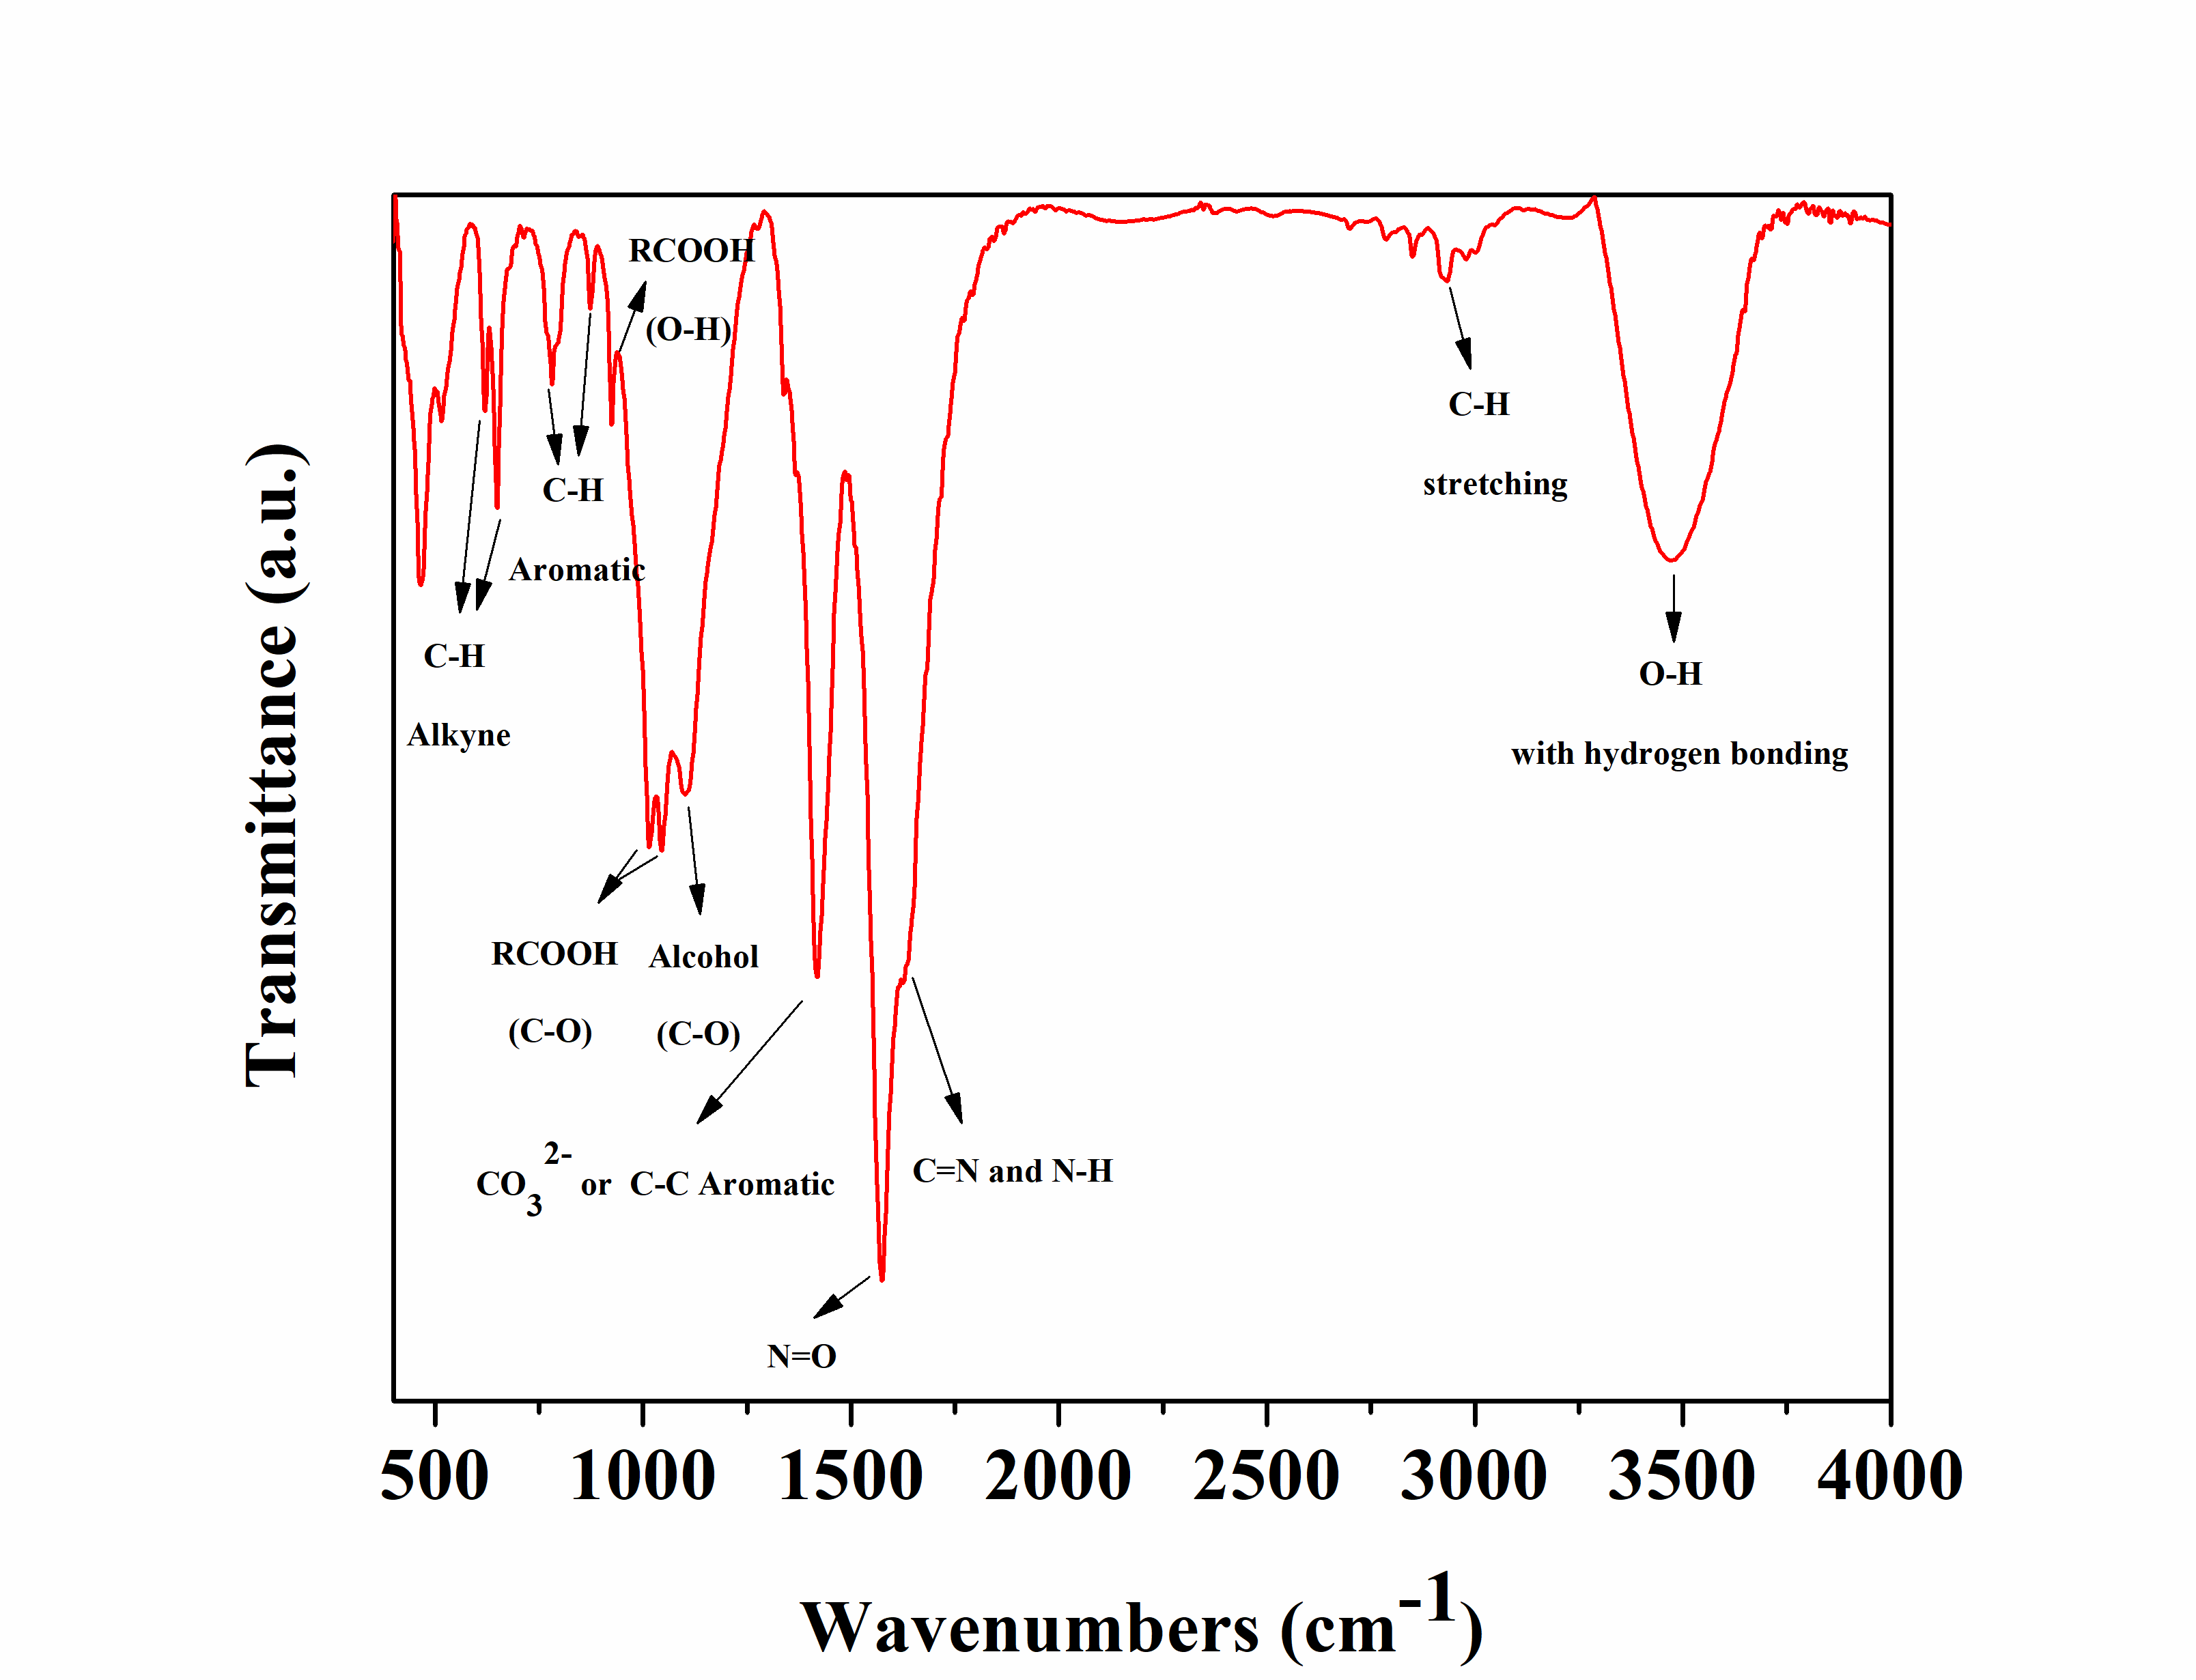 |
| --- | --- | --- | --- | --- | --- | --- | --- | --- | --- | --- | --- | --- | --- | --- | --- | --- | --- | --- | --- | --- | --- | --- | --- | --- | --- | --- | --- | --- | --- | --- | --- |

**Fig. S3** a) Possible bonds in the structure of Vermicompost added by Fe3O4 NPs and b) FTIR infra-red spectrum after DEHP absorption.

| **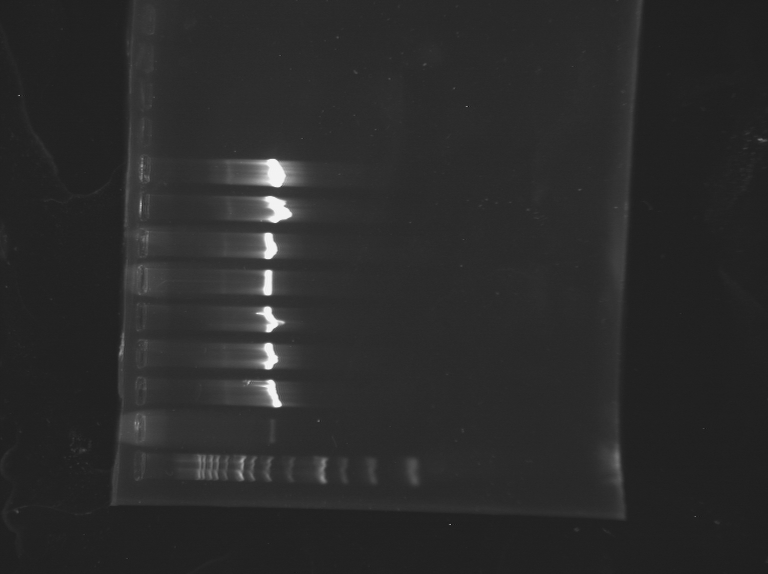**  **a** | **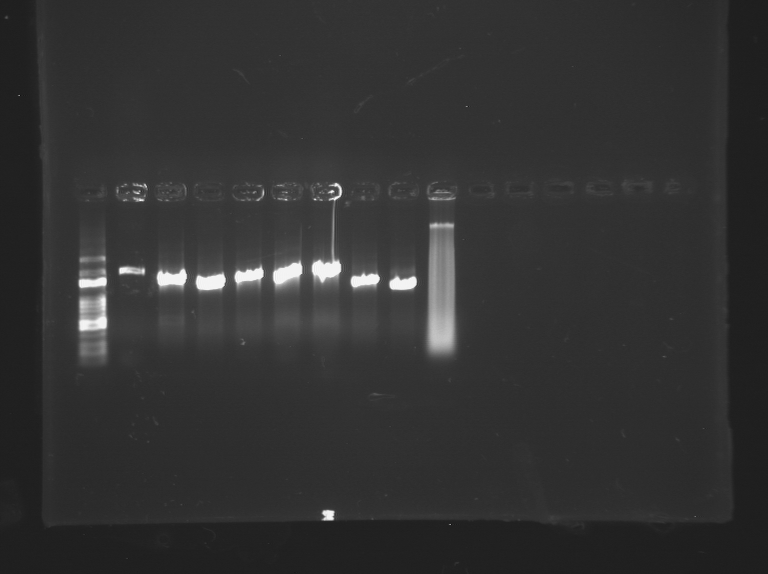**  **b** | 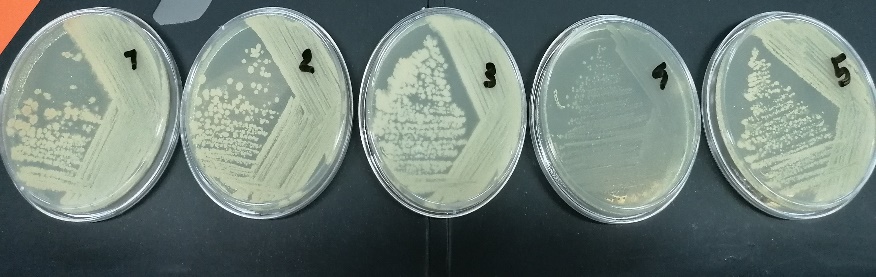  **c** |
| --- | --- | --- |

**Fig. S4** a) Gel electrophoresis image of PCR product and gene fragment amplification, the DNA size marker on the left, and samples L1 to L5 on the right side; b) Gel electrophoresis image of PCR **pure** product of L1 to L5; c) Related microbial plate samples.

**Table S1**  Physicochemical and microbial characteristics of selected soil and vermicompost (Mean ± SD, n=3).

| Parameter/  Media | Density (Bulk) (Kg.m3) | pH | EC (mS/cm) | OM (%) | TC  (%)  dw | TN  (%) dw | C:N | AP  (%) dw | EK  (%) dw | CEC (meq/100g) | DEHP Background dose(mg.kg-1) | Total Plate Count (CFU/ml) |
| --- | --- | --- | --- | --- | --- | --- | --- | --- | --- | --- | --- | --- |
| Agricultural Soil  (0-20 cm depth)  Vermicompost  (85 day process) | 950 ±  0.15  373 ±  0.18 | 6.12 ±0.07 (1:5/H2O) (24°C)  8.18 ± 0.01  (1:10/H2O) (25°C) | 1.28 ± 1.30 (1:5/H2O)  (23°C)  4.08 ± 1.55  (1:10/H2O) | 4.35  ±  2.15  41.20  ± 0.65 (100g) | 7.14  ±  1.08  38.12 ±  1.06 | 0.94 ± 0.75  3.23 ± 0.07 | 7.59  11.8 | 0.38  ±  1.80  1.32  ±  2.06 | 8.0 ±  0.55  1.10 ±  0.02 | 31  74 | 1.49 ±1.45  0.57 ± 0.15 | 106 × 8.4  ±  7.17  108× 7.9  ±  11.53 |

**Table S2** Numeric independent variables, actual factors and their coded levels (α =1.68).

| Factor | Name | Units | Type | Minimum | Maximum | Coded Low | Coded High | Mean | Std. Dev. |
| --- | --- | --- | --- | --- | --- | --- | --- | --- | --- |
| A (X1) | Time | days | Numeric | 4.45 | 51.55 | -1 ↔ 14.00 | +1 ↔ 42.00 | 28.00 | 11.87 |
| B (X2) | Fe3O4 NPs dose | g.kg-1 (media) | Numeric | 0.6636 | 1.34 | -1 ↔ 0.80 | +1 ↔ 1.20 | 1.0000 | 0.1696 |
| C (X3) | DEHP Concentration | mg.kg-1 (dw.soil) | Numeric | 3.18 | 36.82 | -1 ↔ 10.00 | +1 ↔ 30.00 | 20.00 | 8.48 |

**Table S3** DEHP removal efficiency in treatments of nano and bioremediation comparative experiments (Mean ± SD).

| Subset/  DEHP Concentration | Groups | DEHP removal efficiency | | | | | |
| --- | --- | --- | --- | --- | --- | --- | --- |
| Time 1  (7 days, n=24) | | Time 2  (21 days, n=24) | | Time 3  (42 days, n=24) | |
| Mean | STDEV | Mean | STDEV | Mean | STDEV |
| 10 mg/kg | S1 (control) | 12.43 | 0.58 | 12.70 | 0.91 | 14.45 | 0.5 |
| S1V (Soil+ Vermicompost) | 34.8 | 2.13 | 54.79 | 4.99 | 69.34 | 3.15 |
| S1VN (Soil+ Vermicompost+ Fe3O4NP) | 43.47 | 1.06 | 66.75 | 3.12 | 94.58 | 2.65 |
| S1N (Soil + Fe3O4NP) | 54.28 | 5.30 | 67.09 | 4.77 | 80.90 | 2.20 |
| 30 mg/kg | S2 (control) | 13.34 | 1.11 | 14.15 | 0.13 | 15.10 | 0.48 |
| S2V (Soil+ Vermicompost) | 40.87 | 2.42 | 48.99 | 2.03 | 65.25 | 2.45 |
| S2VN (Soil+ Vermicompost+ Fe3O4NP) | 48.22 | 1.80 | 61.50 | 1.41 | 91.16 | 2.60 |
| S2N (Soil+ Fe3O4NP) | 33.77 | 4.65 | 52.38 | 2.28 | 75.76 | 0.98 |

**Table S4** Two-way ANOVA comparisons test for DEHP Removal Efficiency analogy.

| Table Analyzed | DEHP Removal Efficiency,% |  |  |  |  |
| --- | --- | --- | --- | --- | --- |
| Two-way ANOVA | Ordinary |  |  |  |  |
| Alpha | 0.05 |  |  |  |  |
|  |  |  |  |  |  |
| Source of Variation | % of total variation | P value | P value summary | Significant? |  |
| Row Factor | 0.2583 | 0.0987 | ns | No |  |
| Column Factor | 99.60 | <0.0001 | **** | Yes |  |
|  |  |  |  |  |  |
| ANOVA table | SS | DF | MS | F (DFn, DFd) | P value |
| Row Factor | 18.00 | 1 | 18.00 | F (1, 3) = 5.606 | P=0.0987 |
| Column Factor | 6942 | 3 | 2314 | F (3, 3) = 720.6 | P<0.0001 |
| Residual | 9.633 | 3 | 3.211 |  |  |
|  |  |  |  |  |  |
| Difference between row means |  |  |  |  |  |
| Mean of Time 49 (10 mg/kg) | 64.82 |  |  |  |  |
| Mean of Time 49 (30 mg/kg) | 61.82 |  |  |  |  |
| Difference between means | 3.000 |  |  |  |  |
| SE of difference | 1.267 |  |  |  |  |
| 95% CI of difference | -1.032 to 7.032 |  |  |  |  |
| Data summary |  |  |  |  |  |
| Number of columns (Column Factor) | 4 |  |  |  |  |
| Number of rows (Row Factor) | 2 |  |  |  |  |
| Number of values | 8 |  |  |  |  |

**Table S5** The results of two-way ANOVA for TN and AP changes (%) in all treatments.

| Two-way ANOVA, TN (%) | | Ordinary |  | |  | | |  |  | |
| --- | --- | --- | --- | --- | --- | --- | --- | --- | --- | --- |
| Alpha | | 0.05 |  | |  | | |  |  | |
| Source of Variation | | % of total variation | P value | | summary | | | Significant? |  | |
| Row Factor (Different Times) | | 13.12 | 0.0031 | | ** | | | Yes |  | |
| Column Factor (Different Treatment) | | 76.69 | <0.0001 | | **** | | | Yes |  | |
| ANOVA table | | SS | DF | | MS | | | F (DFn, DFd) | P value | |
| Row Factor | | 24.16 | 2 | | 12.08 | | | F (2, 14) = 9.011 | P=0.0031 | |
| Column Factor | | 141.3 | 7 | | 20.18 | | | F (7, 14) = 15.05 | P<0.0001 | |
| Residual | | 18.77 | 14 | | 1.341 | | |  |  | |
| Number of columns | | 8 |  | |  | | |  |  | |
| Number of rows (Row Factor) | | 3 |  | |  | | |  |  | |
| Number of values | | 24 |  | |  | | |  |  | |
|  | | | | | | | | | | |
| Two-way ANOVA, AP (%) | Ordinary | | |  | |  |  | | |  |
| Source of Variation (Alpha=0.05) | % of total variation | | | P value | | summary | Significant? | | |  |
| Row Factor | 45 | | | 0.0025 | | ** | Yes | | |  |
| Column Factor | 22 | | | 0.3219 | | ns | No | | |  |
| ANOVA table | SS | | | DF | | MS | F (DFn, DFd) | | | P value |
| Row Factor | 11 | | | 2 | | 5.6 | F (2, 14) = 9.5 | | | P=0.0025 |
| Column Factor | 5.3 | | | 7 | | 0.76 | F (7, 14) = 1.3 | | | P=0.3219 |
| Residual | 8.3 | | | 14 | | 0.59 |  | | |  |
| Number of columns (Column Factor) | 8 | | |  | |  |  | | |  |
| Number of rows (Row Factor) | 3 | | |  | |  |  | | |  |
| Number of values | 24 | | |  | |  |  | | |  |

**Table S6** The results of two-way ANOVA for EK and SOM changes in all treatments.

| Two-way ANOVA, EK (%) | Ordinary |  |  |  |  |
| --- | --- | --- | --- | --- | --- |
| Source of Variation (Alpha=0.05) | % of total variation | P value | summary | Significant? |  |
| Row Factor | 15 | 0.0018 | ** | Yes |  |
| Column Factor | 74 | <0.0001 | **** | Yes |  |
| ANOVA table | SS | DF | MS | F (DFn, DFd) | P value |
| Row Factor | 12 | 2 | 6.2 | F (2, 14) = 10 | P=0.0018 |
| Column Factor | 59 | 7 | 8.5 | F (7, 14) = 14 | P<0.0001 |
| Residual | 8.5 | 14 | 0.61 |  |  |
| Number of columns (Column Factor) | 8 |  |  |  |  |
| Number of rows (Row Factor) | 3 |  |  |  |  |
| Number of values | 24 |  |  |  |  |
|  |  |  |  |  |  |
| | Two-way ANOVA, SOM(%) | Ordinary |  |  |  |  | | --- | --- | --- | --- | --- | --- | | Alpha | 0.05 |  |  |  |  | | Source of Variation | % of total variation | P value | P value summary | Significant? |  | | Row Factor | 4.847 | 0.0033 | ** | Yes |  | | Column Factor | 91.30 | <0.0001 | **** | Yes |  | | ANOVA table | SS | DF | MS | F (DFn, DFd) | P value | | Row Factor | 253.7 | 2 | 126.9 | F (2, 14) = 8.815 | P=0.0033 | | Column Factor | 4779 | 7 | 682.8 | F (7, 14) = 47.44 | P<0.0001 | | Residual | 201.5 | 14 | 14.39 |  |  | | Data summary |  |  |  |  |  | | Number of columns (Column Factor) | 8 |  |  |  |  | | Number of rows (Row Factor) | 3 |  |  |  |  | | Number of values | 24 |  |  |  |  | | | | | | |
|  | | | | | |

**Table S7** The results of two-way ANOVA for pH, CEC and EC changes in all treatments.

| Two-way ANOVA (pH) (Alpha=0.05) | % of total variation | P value | P value summary | Significant? |  |
| --- | --- | --- | --- | --- | --- |
| Interaction | 1.8 | <0.0001 | **** | Yes |  |
| Row Factor | 0.41 | <0.0001 | **** | Yes |  |
| Column Factor | 97 | <0.0001 | **** | Yes |  |
| ANOVA table | SS | DF | MS | F (DFn, DFd) | P value |
| Interaction | 1.7 | 21 | 0.081 | F (21, 64) = 7.2 | P<0.0001 |
| Row Factor | 0.38 | 3 | 0.13 | F (3, 64) = 11 | P<0.0001 |
| Column Factor | 90 | 7 | 13 | F (7, 64) = 1139 | P<0.0001 |
| Residual | 0.72 | 64 | 0.011 |  |  |
| Number of values | 96 |  |  |  |  |
| | Two-way ANOVA (CEC) (Alpha=0.05) | % of total variation | P value | P value summary | Significant? |  | | --- | --- | --- | --- | --- | --- | | Interaction | 6.3 | <0.0001 | **** | Yes |  | | Row Factor | 4.6 | <0.0001 | **** | Yes |  | | Column Factor | 88 | <0.0001 | **** | Yes |  | | ANOVA table | SS | DF | MS | F (DFn, DFd) | P value | | Interaction | 908 | 21 | 43 | F (21, 64) = 25 | P<0.0001 | | Row Factor | 674 | 3 | 225 | F (3, 64) = 129 | P<0.0001 | | Column Factor | 12824 | 7 | 1832 | F (7, 64) = 1050 | P<0.0001 | | Residual | 112 | 64 | 1.7 |  |  | | | Two-way ANOVA (EC) (Alpha=0.05) | % of total variation | P value | P value summary | Significant? |  | | --- | --- | --- | --- | --- | --- | | Interaction | 7.0 | <0.0001 | **** | Yes |  | | Row Factor | 5.0 | <0.0001 | **** | Yes |  | | Column Factor | 88 | <0.0001 | **** | Yes |  | | ANOVA table | SS | DF | MS | F (DFn, DFd) | P value | | Interaction | 6804354 | 21 | 324017 | F (21, 64) = 5032 | P<0.0001 | | Row Factor | 4845108 | 3 | 1615036 | F (3, 64) = 25080 | P<0.0001 | | Column Factor | 84900247 | 7 | 12128607 | F (7, 64) = 188345 | P<0.0001 | | Residual | 4121 | 64 | 64 |  |  | | | | | | | | | | | | |
|  | | | | | |

**Table S8** The results of Tukey's multiple comparisons test based on the ordinary one-way ANOVA for microbial colony count assay.

| Ordinary one-way ANOVA (In groups with spiked soil treatment at 10 mg.kg-1) | | | | | | | | | | | | | |  |
| --- | --- | --- | --- | --- | --- | --- | --- | --- | --- | --- | --- | --- | --- | --- |
| Number of comparisons per 1 family | 6 | Alpha | | | 0.05 | |  | |  | |  |  | |  |
| Tukey's multiple comparisons test | Mean Diff. | 95.00% CI of diff. | | | Significant? | | Summary | | Adjusted P Value | |  |  | |  |
| Control (S1) vs. S1V | -5.040 | -7.065 to -3.015 | | | Yes | | **** | | <0.0001 | | A-B |  | |  |
| Control (S1) vs. S1VN | -5.108 | -7.133 to -3.082 | | | Yes | | **** | | <0.0001 | | A-C |  | |  |
| Control (S1) vs. S1N | -1.785 | -3.810 to 0.2402 | | | No | | ns | | 0.0910 | | A-D |  | |  |
| S1V vs. S1VN | -0.06750 | -2.093 to 1.958 | | | No | | ns | | 0.9996 | | B-C |  | |  |
| S1V vs. S1N | 3.255 | 1.230 to 5.280 | | | Yes | | ** | | 0.0022 | | B-D |  | |  |
| S1VN vs. S1N | 3.323 | 1.297 to 5.348 | | | Yes | | ** | | 0.0019 | | C-D |  | |  |
|  |  |  | | |  | |  | |  | |  |  | |  |
| Ordinary one-way ANOVA (In groups with spiked soil at 100 mg.kg-1) | | | | | | | | | | | | | |  |
| Number of comparisons per 1 family | 6 | | Alpha | 0.05 | |  | |  | |  | | |  |  |
| Tukey's multiple comparisons test | Mean Diff. | | 95.00% CI of diff. | Significant? | | Summary | | Adjusted P Value | |  | | |  |  |
| Control (S2) vs. S2V | -4.978 | | -6.673 to -3.282 | Yes | | **** | | <0.0001 | | A-B | | |  |  |
| Control (S2) vs. S2VN | -4.190 | | -5.886 to -2.494 | Yes | | **** | | <0.0001 | | A-C | | |  |  |
| Control (S2) vs. S2N | 0.2500 | | -1.446 to 1.946 | No | | ns | | 0.9866 | | A-D | | |  |  |
| S2V vs. S2VN | 0.7875 | | -0.9081 to 2.483 | No | | ns | | 0.5251 | | B-C | | |  |  |
| S2V vs. S2N | 5.228 | | 3.532 to 6.923 | Yes | | **** | | <0.0001 | | B-D | | |  |  |
| S2VN vs. S2N | 4.440 | | 2.744 to 6.136 | Yes | | **** | | <0.0001 | | C-D | | |  |  |
|  |  | |  |  | |  | |  | |  | | |  |  |

**Table S9** RSM model summary statistics and ANOVA/Fit statistics parameters

| | Model Summary Statistics | | | | | | | | | --- | --- | --- | --- | --- | --- | --- | --- | | Source | Std. Dev. | Sequential p-value | R² | Adjusted R² | Predicted R² | PRESS |  | | Linear | 0.9914 | 0.2444 | 0.2233 | 0.0776 | -0.2021 | 24.34 |  | | 2FI | 1.06 | 0.7857 | 0.2822 | -0.0491 | -0.8815 | 38.09 |  | | Quadratic | 0.3048 | < 0.0001 | 0.9541 | 0.9128 | 0.7006 | 6.06 | Suggested | | Cubic | 0.2143 | 0.0811 | 0.9864 | 0.9569 | -0.1400 | 23.08 | Aliased | |  |  |  |  |  |  |  |  | |
| --- | --- | --- | --- | --- | --- | --- | --- | --- | --- | --- | --- | --- | --- | --- | --- | --- | --- | --- | --- | --- | --- | --- | --- | --- | --- | --- | --- | --- | --- | --- | --- | --- | --- | --- | --- | --- | --- | --- | --- | --- | --- | --- | --- | --- | --- | --- | --- | --- | --- | --- | --- | --- | --- | --- | --- | --- |
| | ANOVA/Fit Statistics | | | | | --- | --- | --- | --- | | Std. Dev. | 0.2883 | R² | 0.9507 | | Mean | 11.09 | Adjusted R² | 0.9220 | | C.V. % | 2.60 | Predicted R² | 0.7937 | |  |  | Adeq Precision | 19.4572 | |

**Table S10** ANOVA for Reduced Quadratic model (Response: log10 Total Colony Count)

| ANOVA for Reduced Quadratic model | | | | | | |
| --- | --- | --- | --- | --- | --- | --- |
| Source | Sum of Squares | df | Mean Square | F-value | p-value |  |
| Model | 19.25 | 7 | 2.75 | 33.07 | < 0.0001 | significant |
| A-Time (X1) | 3.84 | 1 | 3.84 | 46.25 | < 0.0001 |  |
| B-Fe3O4 NPs dose (X2) | 0.3601 | 1 | 0.3601 | 4.33 | 0.0595 |  |
| C-DEHP Concentration (X3) | 0.3149 | 1 | 0.3149 | 3.79 | 0.0754 |  |
| AB | 1.12 | 1 | 1.12 | 13.53 | 0.0032 |  |
| A² | 12.71 | 1 | 12.71 | 152.83 | < 0.0001 |  |
| B² | 0.7866 | 1 | 0.7866 | 9.46 | 0.0096 |  |
| C² | 1.38 | 1 | 1.38 | 16.62 | 0.0015 |  |
| Residual | 0.9976 | 12 | 0.0831 |  |  |  |
| Lack of Fit | 0.8257 | 7 | 0.1180 | 3.43 | 0.0967 | not significant |
| Pure Error | 0.1719 | 5 | 0.0344 |  |  |  |
| Cor Total | 20.24 | 19 |  |  |  |  |

1. ***Corresponding Author**

   taghavi_lobat@yahoo.com; l.taghavi@srbiau.ac.ir (L. Taghavi) [↑](#footnote-ref-1)
